# Supplementary material for: Low energy loss (0.42 eV) and efficiency over 15% enabled by non-fullerene acceptors containing N-bis(trifluoromethyl)phenylbenzotriazole as the core in binary solar cells
Source: Royal Society of Chemistry journal article supplement (doi:10.1039/d2tc02289c), 2022-01-01
Supplement: d2tc02289c1.pdf [file d2tc02289c1.pdf]

## Supporting Information

### Low energy loss (0.42 eV) and efficiency over 15% enabled by non- fullerene acceptors containing N- bis(trifluoromethyl)phenylbenzotriazole as core in binary solar cells

María Privado,<sup>a</sup> Beatriz Donoso,<sup>b</sup> Kanupriya Khandelwal,<sup>c</sup> Rahul Singhal,<sup>c</sup> Fernando G. Guijarro,<sup>a</sup> Ángel Díaz-Ortiz,<sup>b</sup> Pilar Prieto,<sup>\*b</sup> Pilar de la Cruz,<sup>\*a</sup> Ganesh D. Sharma,<sup>\*c</sup>  
Fernando Langa<sup>\*a</sup>

<sup>a</sup> *University of Castilla-La Mancha, Institute of Nanoscience, Nanotechnology and Molecular Materials (INAMOL), Campus de la Fábrica de Armas, 45071-Toledo, Spain. e-mail: Fernando.Langa@uclm.es*

<sup>b</sup> *Department of Organic Chemistry, Faculty of Chemical Sciences and Technologies-IRICA, University of Castilla-La Mancha, 13071 Ciudad Real, Spain. e-mail: mariapilar.prieto@uclm.es*

<sup>c</sup> *Department of Physics, The LNM Institute of Information Technology (Deemed University), Jamdoli, Jaipur (Raj.) 302031, India. e-mail: gdsharma@lnmiit.ac.in*

|                                                                               |    |
|-------------------------------------------------------------------------------|----|
| 1. General Remarks. ....                                                      | 2  |
| 2. Synthesis and characterization of TOCR1 and TOCR2. ....                    | 4  |
| 3. <sup>1</sup> H NMR, <sup>13</sup> C NMR, FT-IR and MALDI-TOF spectra. .... | 6  |
| 4. Thermogravimetric Analysis (TGA) of TOCR1 and TOCR2. ....                  | 12 |
| 5. Absorption spectrum in solution ....                                       | 13 |
| 6. Electrochemical Studies ....                                               | 15 |
| 7. Theoretical calculations.....                                              | 17 |
| 8. Photovoltaic studies.....                                                  | 26 |
| 9. XRD studies.....                                                           | 28 |

## 1. General Remarks.

**Experimental conditions.** Anhydrous solvents were dried by purification system Pure-Sov 400. Chromatographic purifications were performed using silica gel 60 Merk 230-400 mesh ASTM. Analytical thin-layer chromatography was performed using ALUGRAM® SIL G/UV<sub>254</sub> silica gel 60. Nuclear magnetic resonance <sup>1</sup>H NMR and <sup>13</sup>C NMR were performed using Bruker Innova 400 Hz. Chemical shifts ( $\delta$ ) values are denoted in ppm. Residual solvent peaks being used as the internal standard (CHCl<sub>3</sub>,  $\delta$  = 7.27 ppm; CD<sub>2</sub>Cl<sub>2</sub>,  $\delta$  = 5.32 ppm). <sup>13</sup>C NMR chemical shifts are reported relative to the solvent residual peaks (CDCl<sub>3</sub>,  $\delta$  = 77.00 ppm; CD<sub>2</sub>Cl<sub>2</sub>,  $\delta$  = 54 ppm). MALDI-TOF spectra were obtained in VOYAGER DETM STR spectrometry, using Dithranol [1,8-dihydroxy-9(10H)-anthracenone] as matrix. Fourier transform infrared spectrophotometer (FT-IR) Jasco FT/IR-6800 spectrometer was used ATR (Attenuated Total Reflection) method, in each case the most characteristic bands are indicated for each compound. Absorption spectra were performed on Shimadzu UV 3600 spectrophotometer. Solutions of different concentration were prepared in CH<sub>2</sub>Cl<sub>2</sub>, toluene, benzonitrile or THF spectroscopy grade, with absorbance between 0.2 and 0.5 using a 1 cm UV cuvette. Thermogravimetric analyses were performed using a TGA/DSC Linea Excellent instrument by Mettler-Toledo and collected under inert atmosphere of nitrogen with a scan rate of 10 °C min<sup>-1</sup>. The weight changes were recorded as a function of temperature.

**Electrochemical Measurements:** Reduction ( $E_{red}$ ) and oxidation potentials ( $E_{ox}$ ) were measured by cyclic voltammetry with a potentiostat BAS CV50W in a conventional three-electrode cell equipped with a glassy carbon working electrode, a platinum wire counter electrode, and an Ag/AgNO<sub>3</sub> reference electrode at scan rate of 100 mV/s. The  $E_{red}$  and  $E_{ox}$  were expressed vs. Fc/Fc<sup>+</sup> used as external reference. In each case, the measurements were done in a deaerated solution containing 1 mM of the sample compound in 0.1 M of (*n*-Bu)<sub>4</sub>NClO<sub>4</sub> in CH<sub>2</sub>Cl<sub>2</sub> (4:1) as an electrolyte solution.

**Computational Details:** Theoretical calculations were carried out within the density functional theory (DFT) framework by using the Gaussian 09, applying density functional theory at the B3LYP level. The basis set of 6-31G\* was used in the calculations (Supercomputation Service of UCLM).

### Device Fabrication and characterization

The solution processed organic solar cells were fabricated on the ITO coated glass substrate with structure ITO/PESOT:PSS/active layer (P1 or P2:TOCR1 or

**TOCR2)/PFN/Al.** The ITO coated glass substrates were cleaned in detergent, and subsequently ultra-sonicated in deionized water, acetone and isopropyl alcohol and dried *in vacuum* oven to remove all the traces of residues. The photovoltaic performance optimization process was started with identifying the donor to acceptor ratio (weight percentage, varying from 1:0.4 to 1:1.3) and after that solvent vapor annealing was applied to maximize the performance of the OSCs. The D-A conjugated polymers P1 and P2 were used as donor (D) and the total concentration of D:A blend mixture was 16 mg/mL in chloroform. The devices were fabricated by depositing PEDOT:PSS as hole transport layer having thickness of 35-40 nm. The active layer was deposited by spin coating (2500 rpm, 60 s) on the top of PEDOT:PSS layer under ambient conditions. For the solvent vapor annealing (SVA), the optimized (as cast 1:1.2 D/A wt ratio) was exposed to the THF vapours for 40s. A thin layer of PFN was spin coated on the top of the active layer from the methanol solution. The aluminium (Al) electrode was deposited onto the top of PFN layer *via* thermal evaporation at the pressure less than  $10^{-5}$  Torr. The current-voltage characteristics of the OSCs were measured under illumination intensity of  $100 \text{ mW/cm}^2$  (AM1.5 G) using a solar simulator and a Keithley 2400 source meter unit. The External quantum efficiency (EQE) measurements were performed using Bentham EQE system.

## 2. Synthesis and characterization of TOCR1 and TOCR2.

### - Synthesis of 2:

A mixture of **1** (0.1 g, 0.2 mmol), tributyl(4,4-dihexyl-4H-cyclopenta[2,1-b:3,4-b']dithiophen-2-yl)stannane (0.29 g, 0.44 mmol), PdCl<sub>2</sub>(PPh<sub>3</sub>)<sub>2</sub> (0.0129 g, 0.018 mmol), LiCl (0.026 g, 0.61 mmol) and CH<sub>3</sub>CN (1 mL) was irradiated under argon in a microwave reactor at 110 °C for 20 min. The solvent was removed under reduced pressure and the residue was purified by means of column chromatography on silica gel employing hexane as the eluent to give pure product **2** as a viscous purple syrup. <sup>1</sup>H-NMR (500 MHz, CDCl<sub>3</sub>) δ/ppm: 8.97 (s, 2H), 8.02 (s, 1H), 7.99 (s, 2H), 7.69 (s, 2H), 7.25 (d, *J* = 4.9 Hz, 2H), 6.99 (d, *J* = 4.9 Hz, 2H), 1.96 – 1.89 (m, 8H), 1.24-1.07 (m, 32H), 0.8 (t, *J* = 7 Hz, 12H). <sup>13</sup>C-NMR (125 MHz, CDCl<sub>3</sub>) δ/ppm: 159.0, 143.4, 141.1, 139.0, 138.1, 136.5, 133.5, 133.2, 128.4, 125.8, 124.0, 123.3, 121.8, 121.5, 120.6, 118.6, 53.8, 37.8, 31.6, 29.7, 24.6, 22.6, 14.0. MS (MALDI-TOF) (*m/z*): calculated 1019.38 [M]<sup>+</sup> for C<sub>56</sub>H<sub>63</sub>F<sub>6</sub>N<sub>3</sub>S<sub>4</sub>; found 1020.38.

### - Synthesis of 3:

Under argon atmosphere, 1,2-dichloroethane (9.3 mL, previously dried with anhydrous MgSO<sub>4</sub> for 30 minutes) was added to compound **2** (0.11 mmol, 116 mg). Subsequently, anhydrous DMF (0.66 mmol, 50 μL) and POCl<sub>3</sub> (0.66 mmol, 60 μL) were added. The reaction mixture was monitored by TLC turning purple after 12 hours at room temperature. Next, the reaction was quenched with a saturated sodium acetate solution, and it was stirred over 1 hour. At that time, the reaction turned pink. The crude was extracted with CH<sub>2</sub>Cl<sub>2</sub> (3 x 40 mL), the organic phase was dried with anhydrous Na<sub>2</sub>SO<sub>4</sub> and concentrated under reduced pressure. The reaction crude was purified by column chromatography (silica gel, CH<sub>2</sub>Cl<sub>2</sub>/ethyl acetate 9:1). A reddish solid **3** was obtained (103 mg, 87%). <sup>1</sup>H-NMR (400 MHz, CDCl<sub>3</sub>) δ/ppm: 9.88 (s, 2H), 8.95 (d, *J* = 1.6 Hz, 2H), 8.05 (s, 3H), 7.76 (s, 2H), 7.64 (s, 2H), 2.06 – 1.92 (m, 8H), 1.32 – 1.09 (m, 34H), 0.81 (t, *J* = 6.5 Hz, 12H). <sup>13</sup>C-NMR (100 MHz, CDCl<sub>3</sub>) δ/ppm: 182.60, 163.29, 158.70, 147.24, 144.06, 143.53, 143.17, 140.83, 137.05, 133.63, 133.29, 130.02, 124.32, 124.12, 122.60, 121.56, 121.41, 120.63, 54.22, 37.63, 31.56, 29.66, 24.74, 22.63, 13.99. MS (MALDI-TOF) (*m/z*): calculated 1075.37 [M]<sup>+</sup> for C<sub>58</sub>H<sub>63</sub>F<sub>6</sub>N<sub>3</sub>O<sub>2</sub>S<sub>4</sub>; found 1075.39.

### - Synthesis of TOCR1:

Under argon atmosphere, anhydrous DMF (8 mL) was added over compound **2** (0.05 mmol, 59 mg) and tetracyanoethylene (TCNE) (0.69 mmol, 89 mg). Subsequently, the reaction was heated to 120 °C and was quenched with H<sub>2</sub>O after disappeared the starting

material. Then, the crude was extracted with  $\text{CHCl}_3$  (3 x 20 mL), and the organic phase was dried with anhydrous  $\text{Na}_2\text{SO}_4$  and concentrated under reduced pressure. The reaction crude was purified by GPC in dichloromethane. A navy blue solid **TOCR1** was obtained after washing with MeOH (50 mg, 82 %).  $^1\text{H-NMR}$  (400 MHz,  $\text{CD}_2\text{Cl}_2$ )  $\delta/\text{ppm}$ : 9.01 (s, 2H), 8.13 (s, 1H), 8.11 (s, 2H), 7.95 (s, 2H), 7.89 (s, 2H), 2.07 (m, 8H), 1.40 – 0.97 (m, 32H), 0.81 (t,  $J = 6.9$  Hz, 5H).  $^{13}\text{C-NMR}$  (100 MHz,  $\text{CD}_2\text{Cl}_2$ )  $\delta/\text{ppm}$ : 167.66, 160.59, 154.61, 148.77, 142.99, 140.70, 137.26, 136.22, 133.51, 133.17, 132.18, 131.12, 125.04, 124.75, 124.21, 123.15, 121.78, 121.50, 120.90, 113.84, 113.48, 113.36, 75.98, 54.83, 37.71, 31.50, 29.48, 24.63, 22.57, 13.74. FT-IR (ATR)  $\nu/\text{cm}^{-1}$ : 3077, 2926, 2854, 2212, 1474, 1331, 1276, 1135. MS (MALDI-TOF) (m/z): calculated 1221.38  $[\text{M}]^+$  for  $\text{C}_{66}\text{H}_{61}\text{F}_6\text{N}_9\text{O}_2\text{S}_4$ ; found 1221.29.

- Synthesis of **TOCR2**:

A catalytic amount of pyridine (0.5 mL) was added to a solution of compound **3** (0.09 mmol, 103 mg) and 2-(5,6-difluoro-3-oxo-2,3-dihydro-1H-inden-1-ylidene)-malononitrile (0.63 mmol, 145 mg) in  $\text{CHCl}_3$  (7.5 mL), and the mixture was stirred under inert and anhydrous conditions at 65 °C. After monitoring by TLC, it was concentrated under reduced pressure after 2 hours of reaction. The reaction crude was purified by column chromatography (silica gel, 100%  $\text{CHCl}_3$ ) and after washed with MeOH and *n*-hexane. A dark blue solid **TOCR2** was obtained (85 mg, 63 %).  $^1\text{H-NMR}$  (400 MHz,  $\text{CDCl}_3$ , 323 K)  $\delta/\text{ppm}$ : 8.94 (s, 5H), 8.54 (s, 2H), 8.07 (s, 2H), 7.87 (s, 2H), 7.69 (s, 4H), 2.03 (m, 8H), 1.16 (m, 34H), 0.81 (t, 12H). FT-IR (ATR)  $\nu/\text{cm}^{-1}$ : 3076, 2927, 2854, 2217, 1687, 1528, 1470, 1391, 1275, 1124. MS (MALDI-TOF) (m/z): calculated 1499.41  $[\text{M}]^+$  for  $\text{C}_{82}\text{H}_{67}\text{F}_{10}\text{N}_7\text{O}_2\text{S}_4$ ; found 1499.31.

### 3. $^1\text{H}$ NMR, $^{13}\text{C}$ NMR, FT-IR and MALDI-TOF spectra.

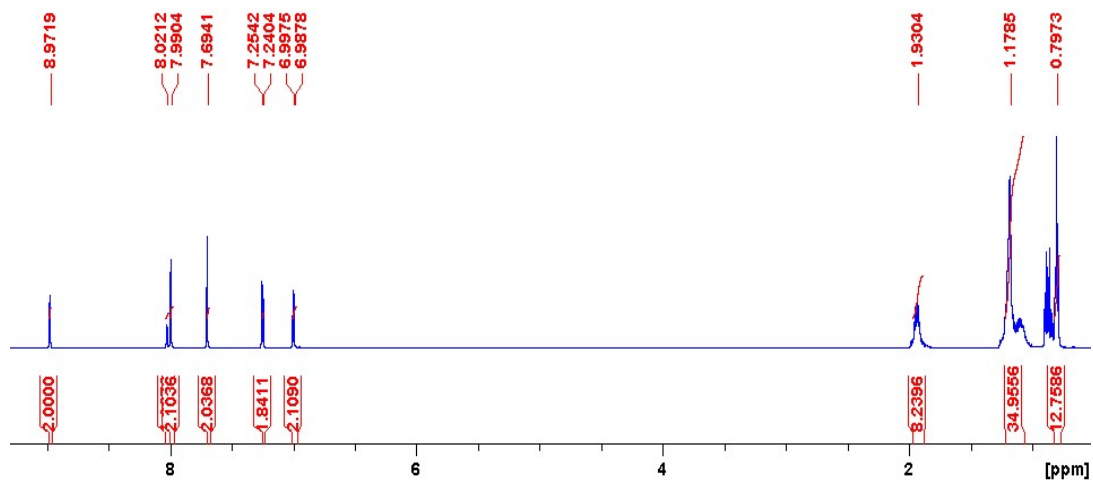

Figure S1.  $^1\text{H}$ -NMR (500MHz,  $\text{CDCl}_3$ ) spectrum of 2.

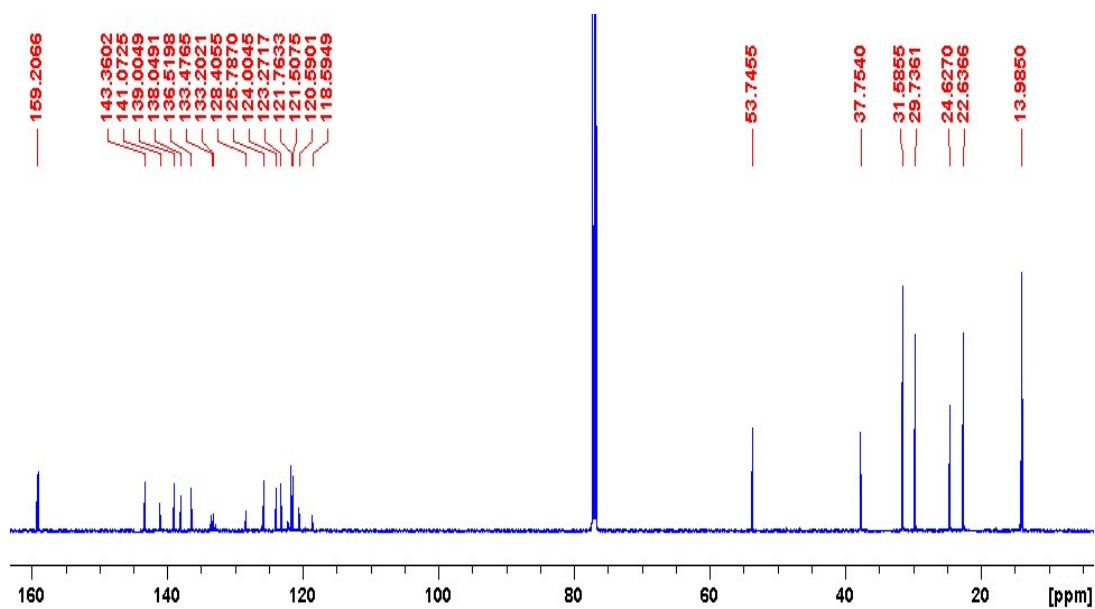

Figure S2.  $^{13}\text{C}$ -NMR (125MHz,  $\text{CDCl}_3$ ) spectrum of compound 2.

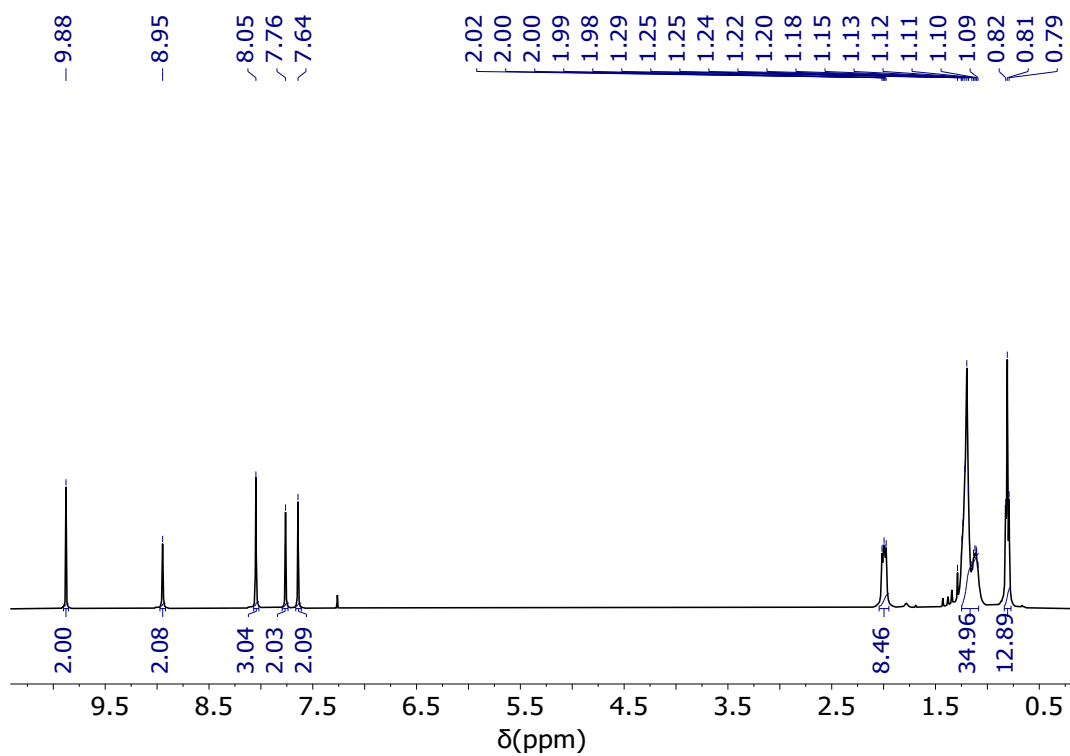

Figure S3.  $^1\text{H-NMR}$  (400MHz,  $\text{CDCl}_3$ ) spectrum of **3**

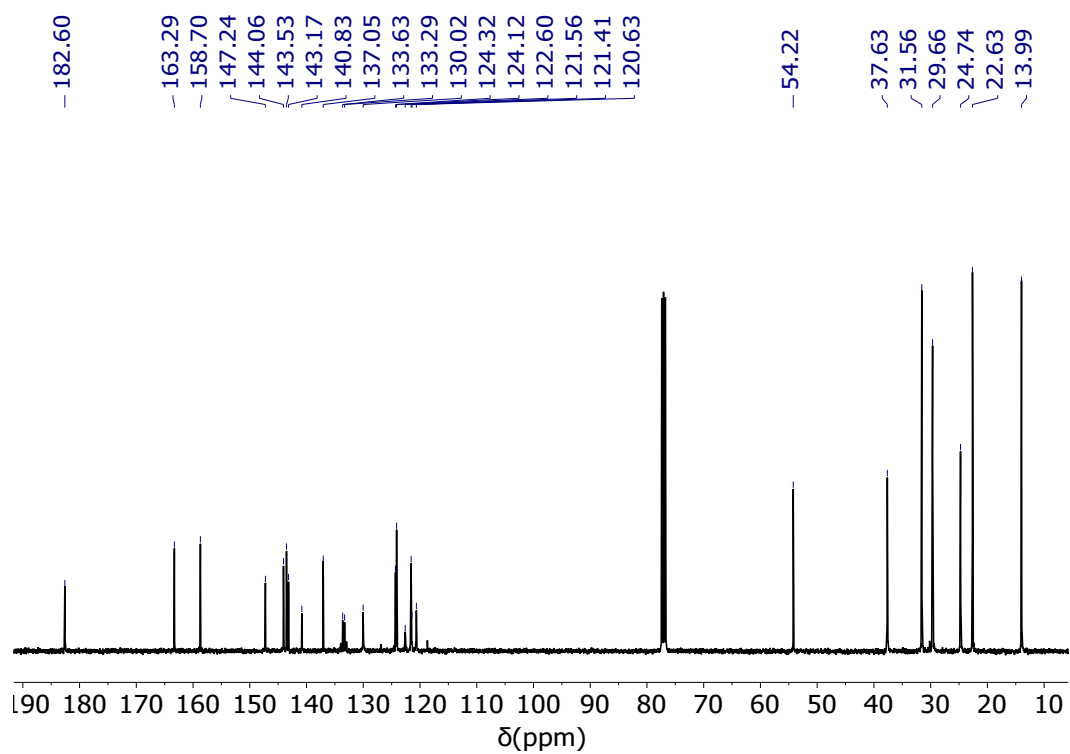

Figure S4.  $^{13}\text{C-NMR}$  (100MHz,  $\text{CDCl}_3$ ) spectrum of compound **3**.

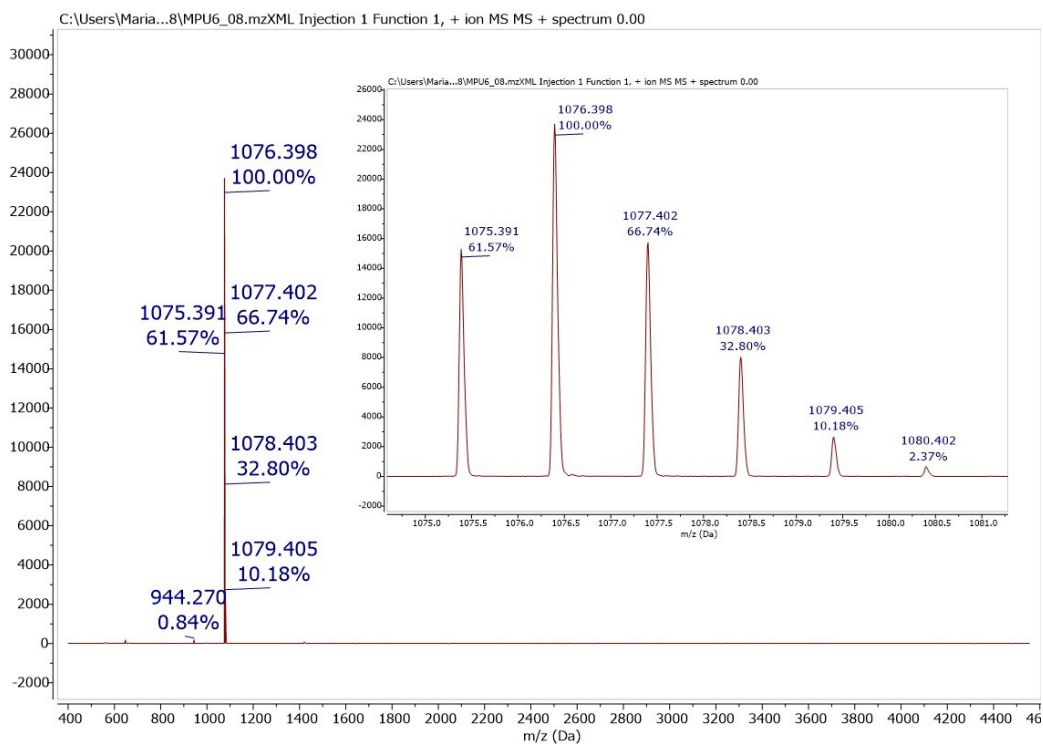

**Figure S5.** MALDI-TOF MS spectrum of compound **3** (Matrix: Dithranol).

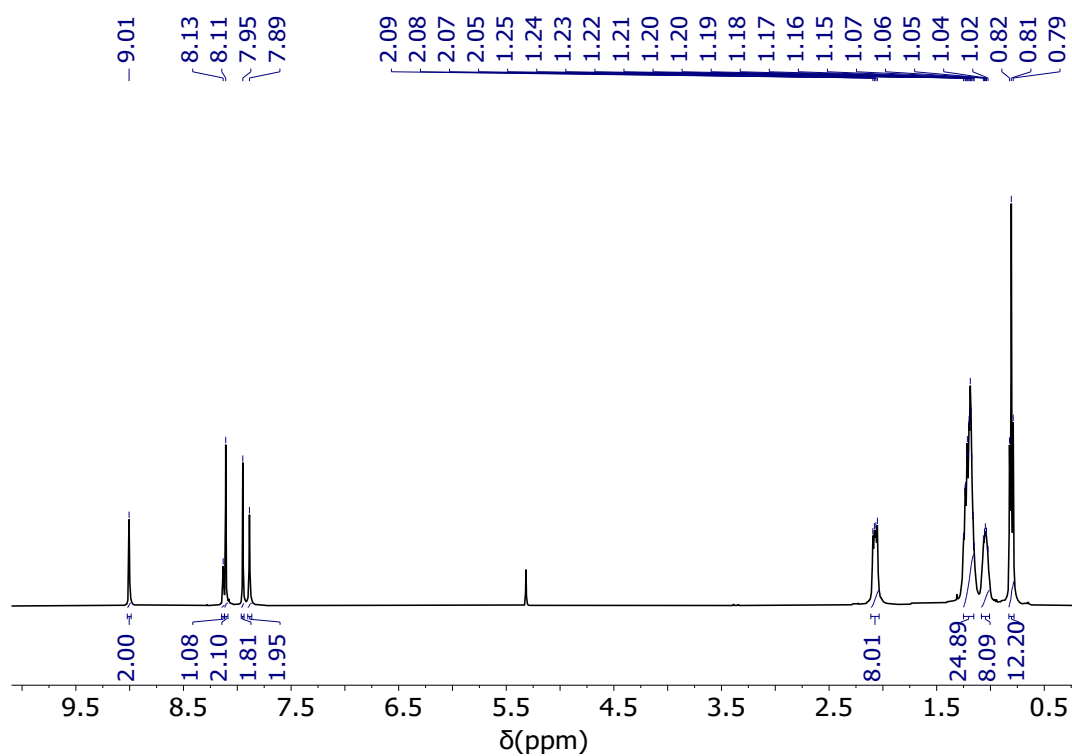

**Figure S6.**  $^1\text{H-NMR}$  (400MHz,  $\text{CD}_2\text{Cl}_2$ ) spectrum of **TOCR1**.



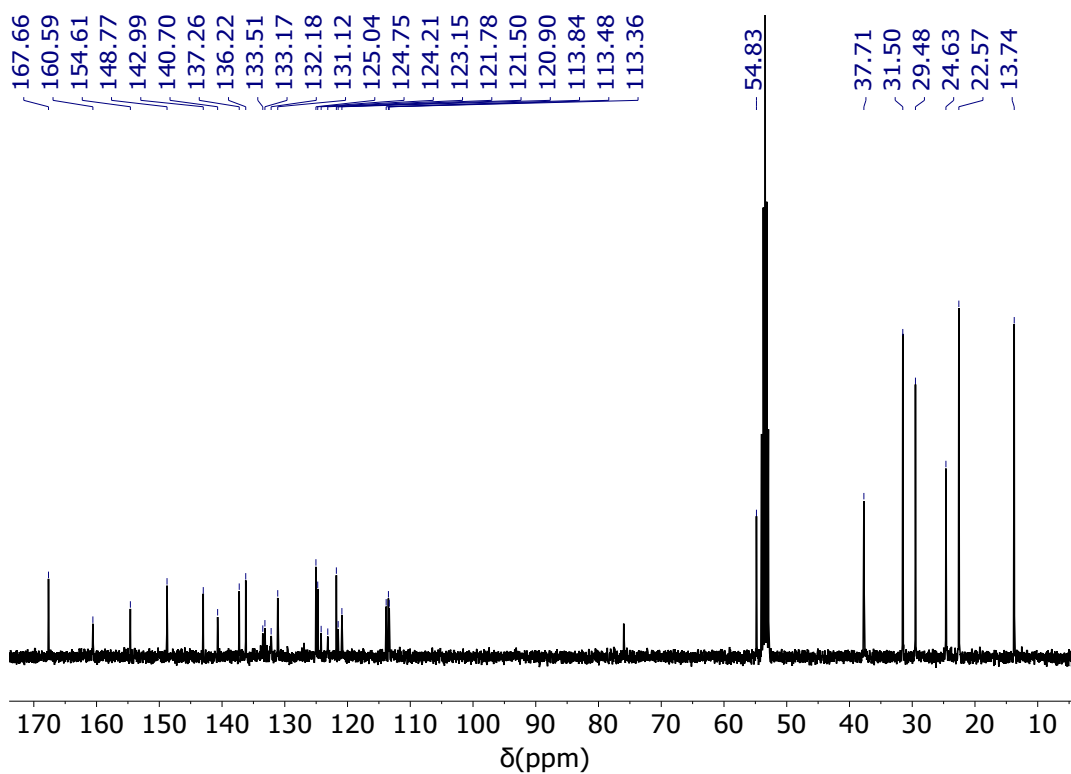

**Figure S7.**  $^{13}\text{C}$ -NMR (100MHz,  $\text{CDCl}_3$ ) spectrum of compound **TOCR1**.

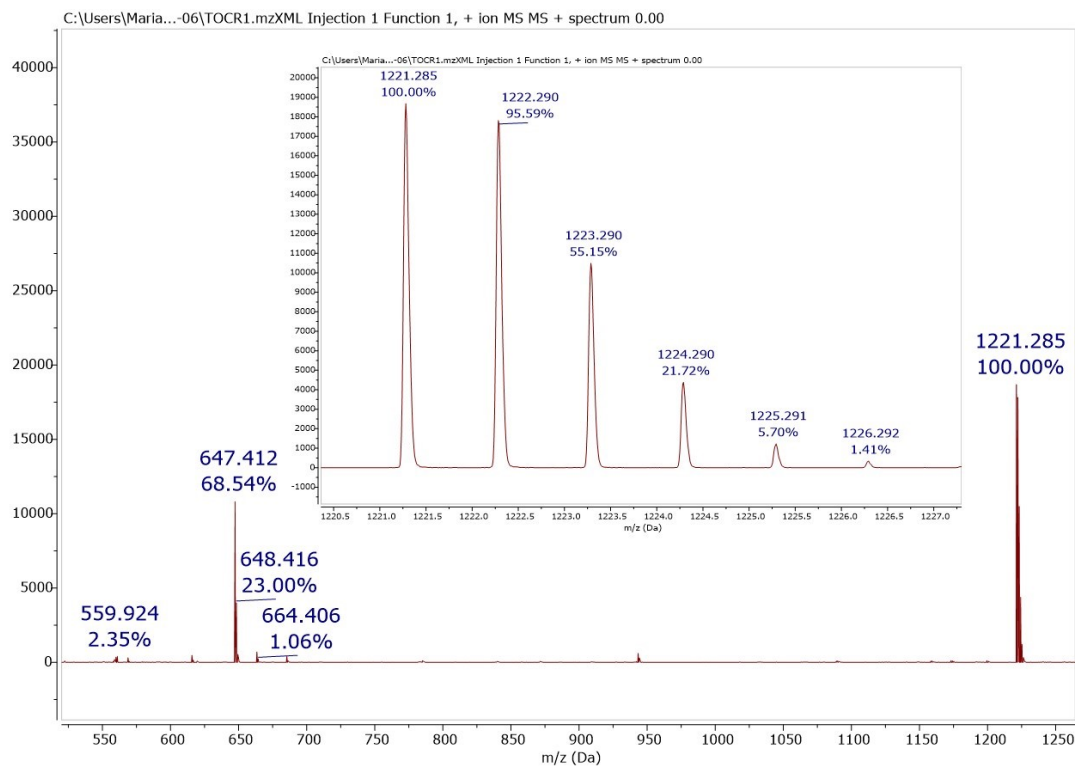

**Figure S8.** MALDI-TOF MS spectrum of **TOCR1** (Matrix: Dithranol).

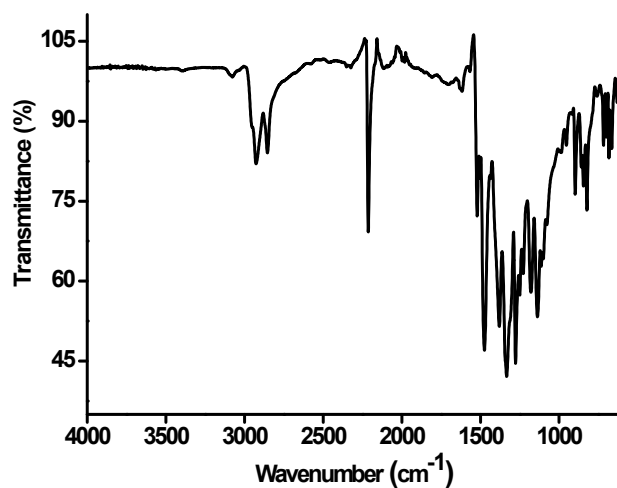

**Figure S9.** FT-IR (ATR) spectrum of **TOCR1**.

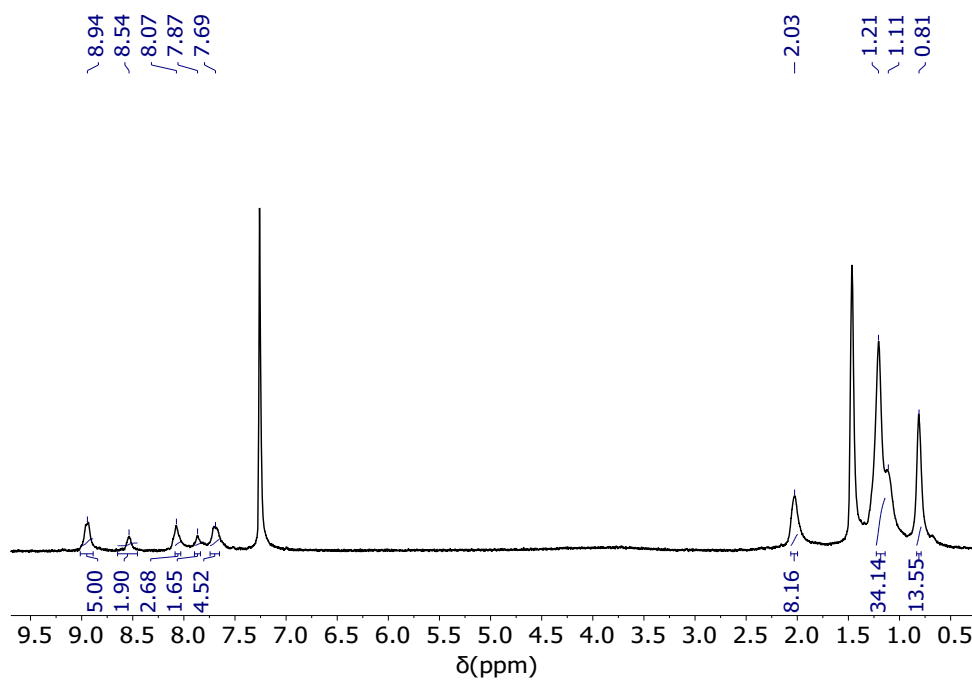

**Figure S10.** <sup>1</sup>H-NMR (400MHz, CDCl<sub>3</sub>) spectrum of **TOCR2**.

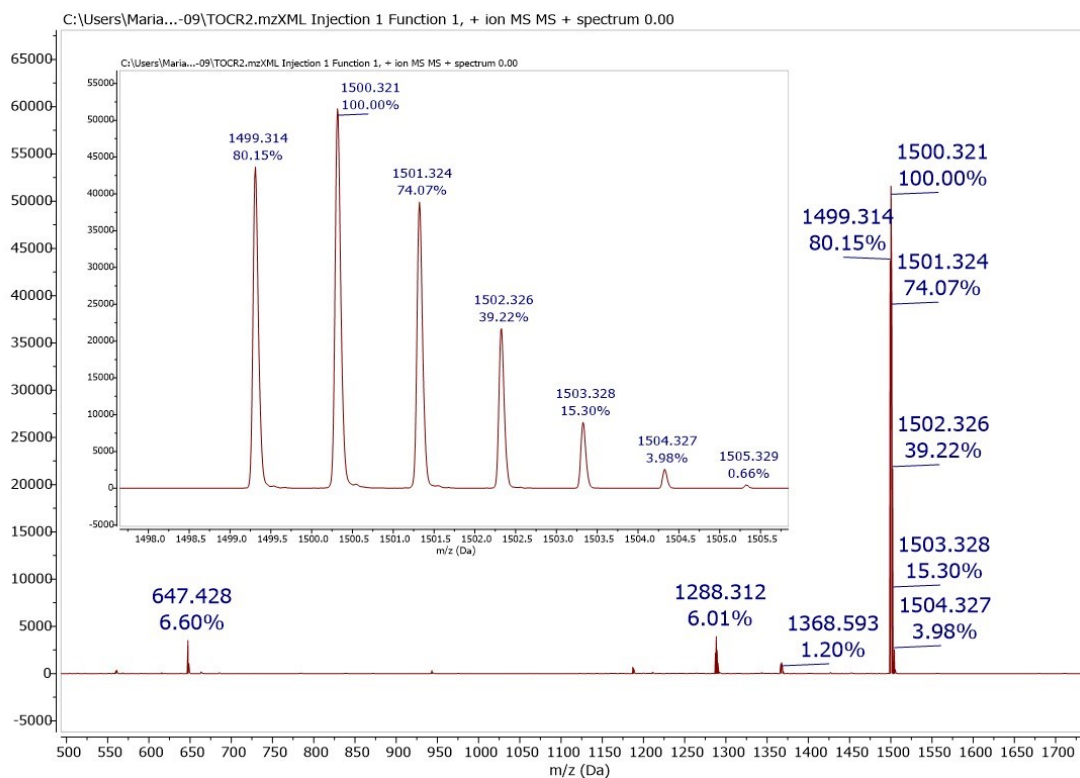

**Figure S11.** MALDI-TOF MS spectrum of **TOCR2** (Matrix: Dithranol).

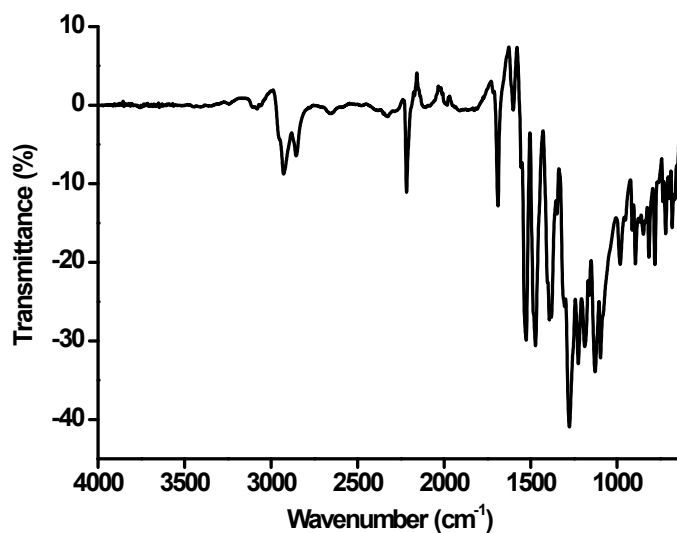

**Figure S12.** FT-IR (ATR) spectrum of **TOCR2**.

#### 4. Thermogravimetric Analysis (TGA) of TOCR1 and TOCR2.

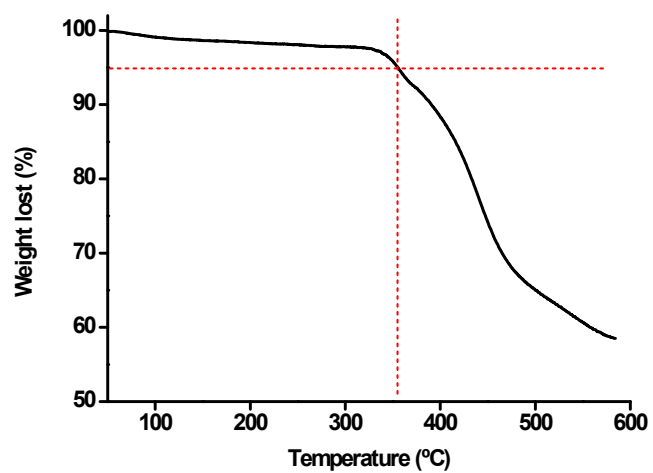

Figure S13. TGA of TOCR1.

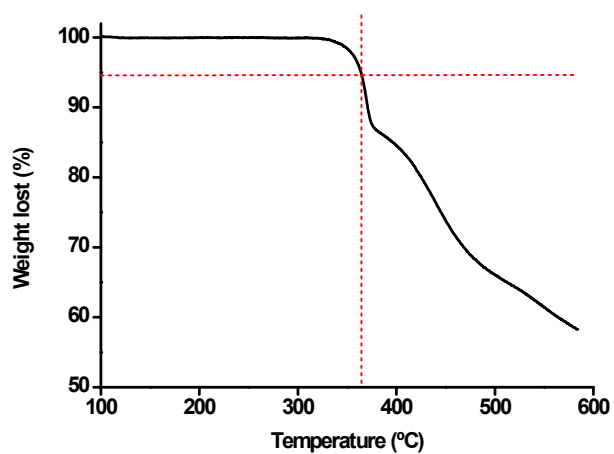

Figure S14. TGA of TOCR2.

## 5. Absorption spectrum in solution

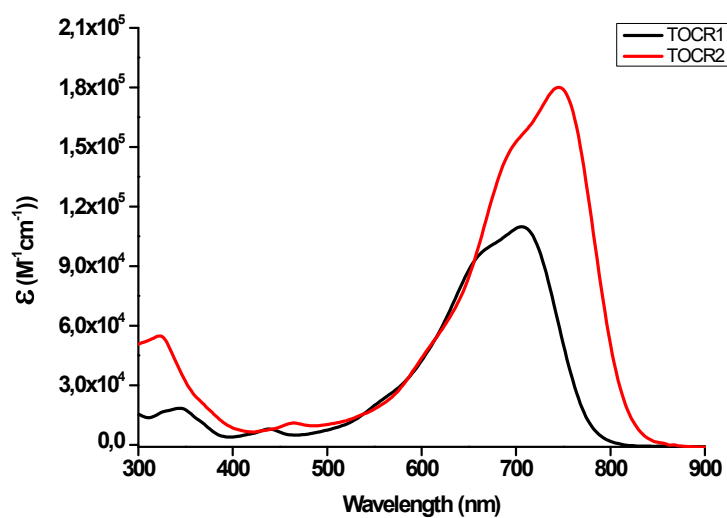

**Figure S15.** Absorption spectrum of **TOCR1** ( $CH_2Cl_2$ ,  $3.7 \times 10^{-6} M$ ) and **TOCR2** ( $CH_2Cl_2$ ,  $2.2 \times 10^{-6} M$ ).

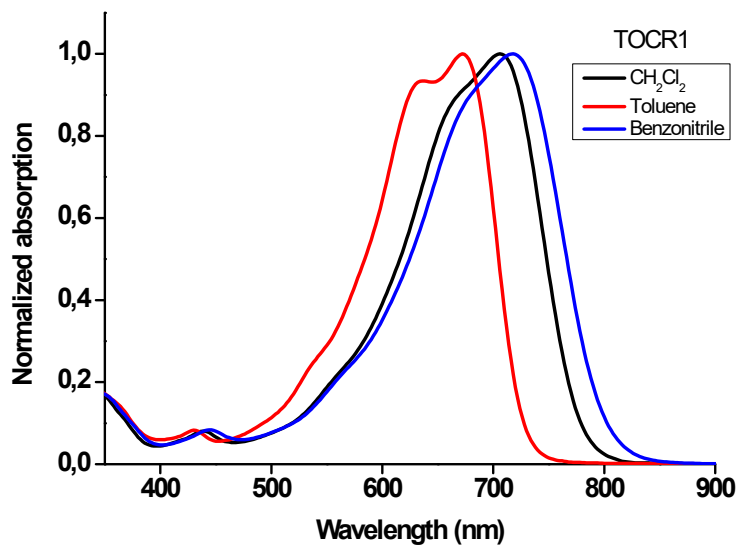

**Figure S16.** Normalized absorption spectra of **TOCR1** in  $CH_2Cl_2$  (c:  $3.68 \times 10^{-6} M$ ), toluene (c:  $3.06 \times 10^{-6} M$ ) and benzonitrile (c:  $4.55 \times 10^{-6} M$ ).

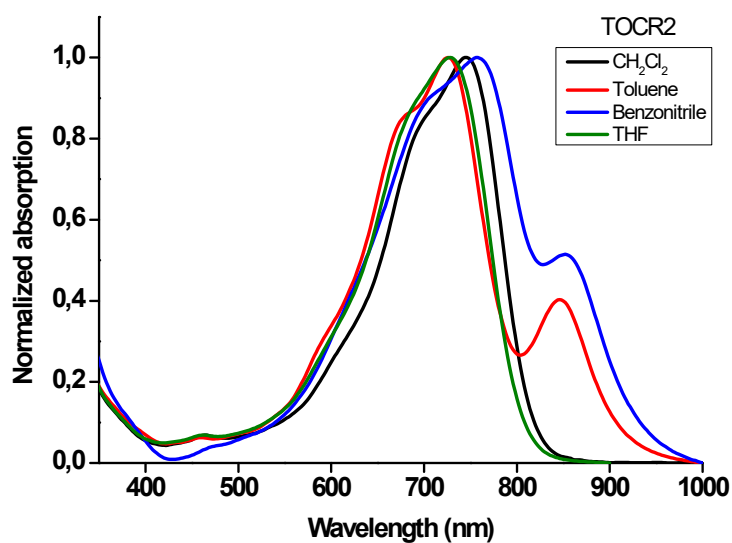

**Figure S17.** Normalized absorption spectra of **TOCR2** in CH<sub>2</sub>Cl<sub>2</sub> (c: 2.20 x 10<sup>-6</sup>M), toluene (c: 3.66 x 10<sup>-6</sup>M), benzonitrile (c: 8.79 x 10<sup>-6</sup>M) and tetrahydrofuran (c: 6.66 x 10<sup>-6</sup>M).

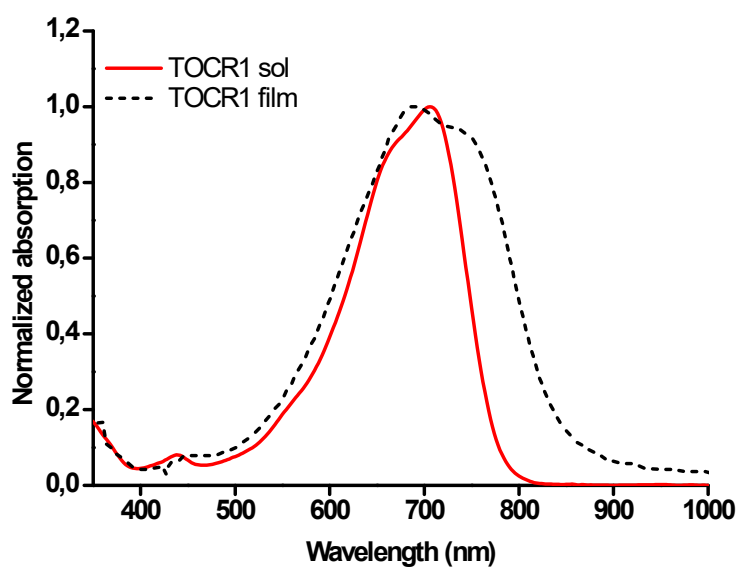

**Figure S18** Absorption spectrum of **TOCR1** in solution and in film.

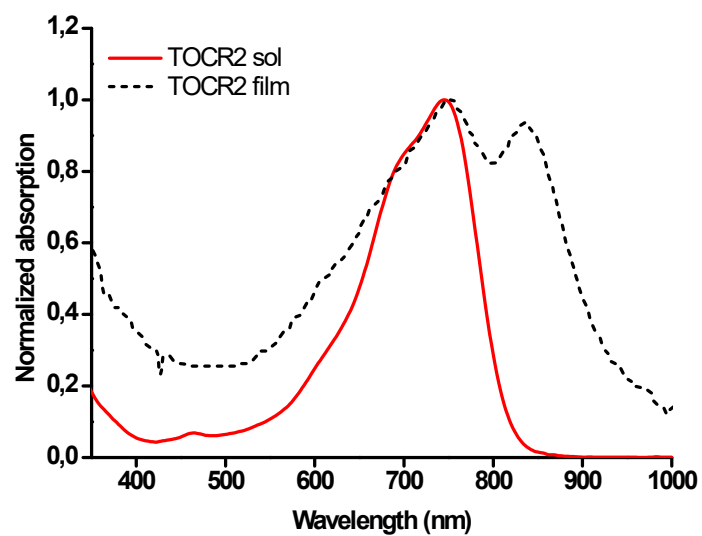

**Figure S19.** Absorption spectrum of **TOCR2** in solution and in film.

## 6. Electrochemical Studies

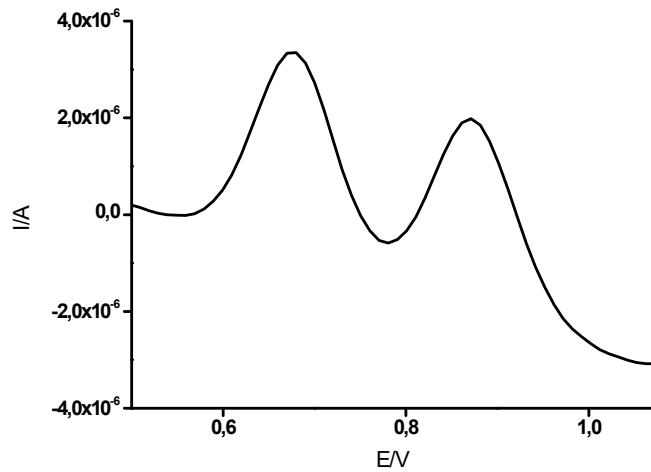

**Figure S20.** OSWV (oxidation side) of **TOCR1**.

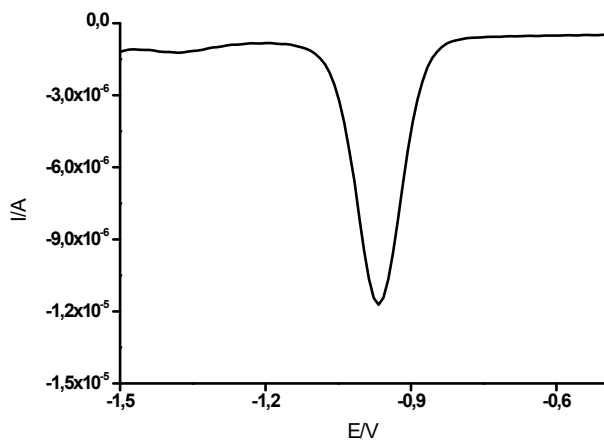

**Figure S21.** OSWV (reduction side) of TOCR1.

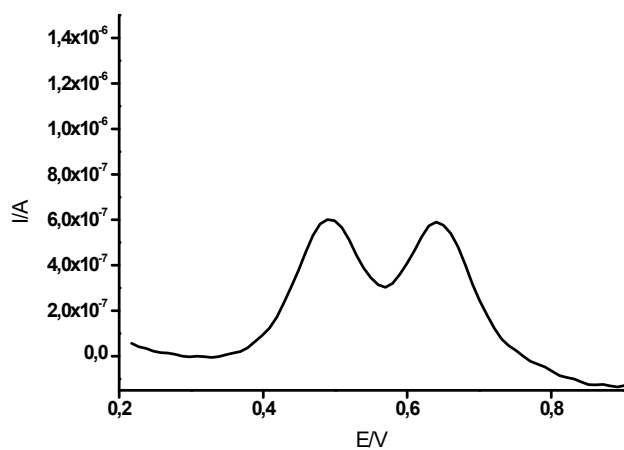

**Figure S22.** OSWV (oxidation side) of TOCR2.

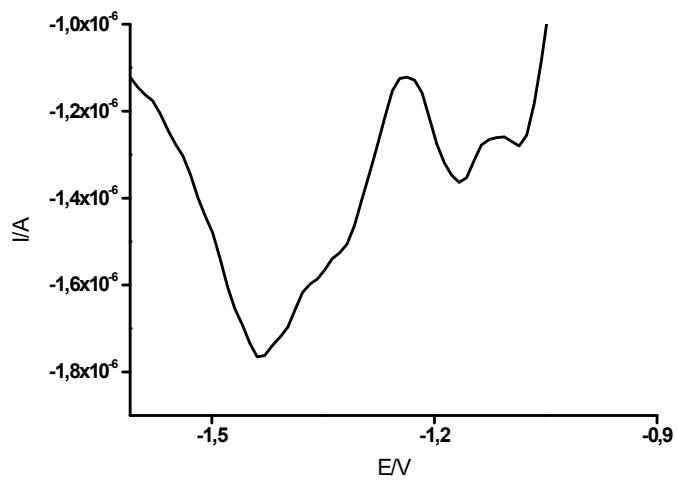

**Figure S23.** OSWV (reduction side) of TOCR2.



## 7. Theoretical calculations

**Table S1.** Energetic values of the most relevant conformations of the central fragment in Hartrees and relative values in Kcal/mol calculated at the B3LYP/6-31G(d,p) level.

|                     |                                                                                   |                                                                                    |                                                                                     |
|---------------------|-----------------------------------------------------------------------------------|------------------------------------------------------------------------------------|-------------------------------------------------------------------------------------|
| <b>Conformation</b> | 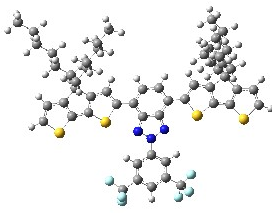 |  |  |
| <b>E (Hartrees)</b> | -4528,061554                                                                      | -4528,065188                                                                       | -4528,068516                                                                        |
| <b>(Kcal/mol)</b>   | (2,7)                                                                             | (0,42)                                                                             | (0)                                                                                 |

**Table S2.** Energetic values of the most relevant conformations of the compounds **TOCR1** and **TOCR2** in Hartrees and relative values in Kcal/mol calculated at the B3LYP/6-31G(d,p) level.

| <b>Compound</b>     | <b>Conformations</b>                                                                |                                                                                      |                                                                                       |
|---------------------|-------------------------------------------------------------------------------------|--------------------------------------------------------------------------------------|---------------------------------------------------------------------------------------|
| <b>TOCR1</b>        | 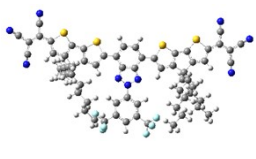 |  |  |
| <b>E (Hartrees)</b> | -5236.29892                                                                         | -5236.299407                                                                         | -5236.299875                                                                          |
| <b>(Kcal/mol)</b>   | (0,6)                                                                               | (0,29)                                                                               | (0)                                                                                   |
| <b>Compound</b>     | <b>Conformations</b>                                                                |                                                                                      |                                                                                       |
| <b>TOCR2</b>        |  |  |  |
| <b>E (Hartrees)</b> | -6289,959277                                                                        | -6289,96143                                                                          | -6289,963536                                                                          |
| <b>(Kcal/mol)</b>   | (2,67)                                                                              | (1,32)                                                                               | (0)                                                                                   |

**Table S3.** Cartesian coordinates for optimized geometry of **TOCR1**.

| Center Number | Atomic Number | Atomic Type | Coordinates (Angstroms) |           |           |
|---------------|---------------|-------------|-------------------------|-----------|-----------|
|               |               |             | X                       | Y         | Z         |
| 1             | 6             | 0           | 0.527921                | -0.625805 | -0.250229 |

|    |    |   |           |           |           |
|----|----|---|-----------|-----------|-----------|
| 2  | 6  | 0 | -0.901660 | -0.558870 | -0.241480 |
| 3  | 6  | 0 | -1.723626 | -1.728184 | -0.351427 |
| 4  | 6  | 0 | -1.002189 | -2.917430 | -0.465672 |
| 5  | 6  | 0 | 0.403789  | -2.983575 | -0.470787 |
| 6  | 6  | 0 | 1.235274  | -1.867616 | -0.363220 |
| 7  | 7  | 0 | 1.006206  | 0.627224  | -0.144931 |
| 8  | 7  | 0 | -0.093800 | 1.376487  | -0.078527 |
| 9  | 7  | 0 | -1.259610 | 0.733156  | -0.130380 |
| 10 | 6  | 0 | -0.027025 | 2.791983  | 0.036240  |
| 11 | 6  | 0 | 1.216666  | 3.422977  | 0.031023  |
| 12 | 6  | 0 | 1.269816  | 4.810738  | 0.153588  |
| 13 | 6  | 0 | 0.103595  | 5.563309  | 0.281875  |
| 14 | 6  | 0 | -1.131200 | 4.910894  | 0.279503  |
| 15 | 6  | 0 | -1.208885 | 3.526865  | 0.157072  |
| 16 | 6  | 0 | 2.681252  | -1.949224 | -0.360277 |
| 17 | 6  | 0 | -3.170711 | -1.670776 | -0.347282 |
| 18 | 16 | 0 | -4.136413 | -3.126301 | -0.654340 |
| 19 | 6  | 0 | -5.594597 | -2.216652 | -0.471808 |
| 20 | 6  | 0 | -5.358766 | -0.869205 | -0.203402 |
| 21 | 6  | 0 | -3.987880 | -0.565683 | -0.126505 |
| 22 | 6  | 0 | -7.001075 | -2.449856 | -0.491881 |
| 23 | 6  | 0 | -7.665748 | -1.245077 | -0.232512 |
| 24 | 6  | 0 | -6.670593 | -0.099377 | -0.046588 |
| 25 | 16 | 0 | -8.067173 | -3.778425 | -0.743495 |
| 26 | 6  | 0 | -9.465757 | -2.709268 | -0.497815 |
| 27 | 6  | 0 | -9.050611 | -1.391372 | -0.239531 |
| 28 | 16 | 0 | 3.499505  | -3.506467 | -0.586285 |
| 29 | 6  | 0 | 5.039255  | -2.735318 | -0.442254 |
| 30 | 6  | 0 | 4.937653  | -1.359545 | -0.245984 |
| 31 | 6  | 0 | 3.602779  | -0.919855 | -0.189851 |
| 32 | 6  | 0 | 6.414426  | -3.106696 | -0.437301 |
| 33 | 6  | 0 | 7.197973  | -1.963118 | -0.232354 |
| 34 | 6  | 0 | 6.318354  | -0.717615 | -0.088890 |
| 35 | 16 | 0 | 7.336561  | -4.546984 | -0.635885 |
| 36 | 6  | 0 | 8.561614  | -2.251460 | -0.257230 |
| 37 | 6  | 0 | 2.605174  | 5.511067  | 0.087361  |
| 38 | 9  | 0 | 2.619588  | 6.625097  | 0.845081  |
| 39 | 9  | 0 | 2.896612  | 5.883620  | -1.178979 |
| 40 | 9  | 0 | 3.610326  | 4.711580  | 0.507977  |
| 41 | 6  | 0 | -2.387912 | 5.738471  | 0.396635  |
| 42 | 9  | 0 | -3.488654 | 4.971081  | 0.554104  |
| 43 | 9  | 0 | -2.577010 | 6.496685  | -0.706041 |
| 44 | 9  | 0 | -2.321885 | 6.580939  | 1.447246  |
| 45 | 6  | 0 | -4.324243 | 6.189532  | -3.924374 |
| 46 | 6  | 0 | -5.468087 | 5.208887  | -3.648143 |
| 47 | 6  | 0 | -5.082789 | 4.105202  | -2.655750 |
| 48 | 6  | 0 | -6.195805 | 3.080027  | -2.406284 |
| 49 | 6  | 0 | -5.825424 | 2.043478  | -1.335550 |
| 50 | 6  | 0 | -6.883657 | 0.941088  | -1.194521 |
| 51 | 6  | 0 | -6.748067 | -0.666809 | 7.675826  |
| 52 | 6  | 0 | -6.865582 | 0.246679  | 6.452244  |
| 53 | 6  | 0 | -6.715297 | -0.501814 | 5.122123  |
| 54 | 6  | 0 | -6.832608 | 0.406111  | 3.891864  |
| 55 | 6  | 0 | -6.681886 | -0.346917 | 2.563365  |

|     |   |   |           |           |           |
|-----|---|---|-----------|-----------|-----------|
| 56  | 6 | 0 | -6.803852 | 0.578719  | 1.346135  |
| 57  | 6 | 0 | 10.387085 | 3.087941  | 5.306625  |
| 58  | 6 | 0 | 9.065163  | 2.415067  | 4.925651  |
| 59  | 6 | 0 | 9.067480  | 1.840810  | 3.503517  |
| 60  | 6 | 0 | 7.746700  | 1.165502  | 3.114919  |
| 61  | 6 | 0 | 7.752866  | 0.589338  | 1.691708  |
| 62  | 6 | 0 | 6.420232  | -0.078280 | 1.330124  |
| 63  | 6 | 0 | 4.936547  | 5.912578  | -3.874270 |
| 64  | 6 | 0 | 5.857285  | 4.705310  | -3.673413 |
| 65  | 6 | 0 | 5.348894  | 3.720844  | -2.612539 |
| 66  | 6 | 0 | 6.250996  | 2.492809  | -2.440207 |
| 67  | 6 | 0 | 5.780569  | 1.541085  | -1.330873 |
| 68  | 6 | 0 | 6.648904  | 0.279361  | -1.241025 |
| 69  | 1 | 0 | -1.540915 | -3.856397 | -0.546213 |
| 70  | 1 | 0 | 0.850644  | -3.969163 | -0.556012 |
| 71  | 1 | 0 | 2.121112  | 2.837738  | -0.061529 |
| 72  | 1 | 0 | 0.156350  | 6.640154  | 0.392041  |
| 73  | 1 | 0 | -2.163870 | 3.020869  | 0.158452  |
| 74  | 1 | 0 | -3.573201 | 0.408904  | 0.085683  |
| 75  | 1 | 0 | -9.764384 | -0.595122 | -0.064771 |
| 76  | 1 | 0 | 3.284341  | 0.099146  | -0.025264 |
| 77  | 1 | 0 | 9.356929  | -1.525586 | -0.142851 |
| 78  | 1 | 0 | -4.638308 | 6.992231  | -4.599049 |
| 79  | 1 | 0 | -3.965982 | 6.649725  | -2.997365 |
| 80  | 1 | 0 | -3.471764 | 5.680666  | -4.388990 |
| 81  | 1 | 0 | -5.797643 | 4.752798  | -4.591501 |
| 82  | 1 | 0 | -6.335814 | 5.756993  | -3.257111 |
| 83  | 1 | 0 | -4.788883 | 4.565203  | -1.702824 |
| 84  | 1 | 0 | -4.189968 | 3.581039  | -3.027144 |
| 85  | 1 | 0 | -6.433513 | 2.565549  | -3.347861 |
| 86  | 1 | 0 | -7.115000 | 3.601055  | -2.104213 |
| 87  | 1 | 0 | -5.675988 | 2.563702  | -0.380873 |
| 88  | 1 | 0 | -4.861823 | 1.590032  | -1.598755 |
| 89  | 1 | 0 | -6.948592 | 0.394017  | -2.142579 |
| 90  | 1 | 0 | -7.868482 | 1.400310  | -1.036803 |
| 91  | 1 | 0 | -6.859631 | -0.103508 | 8.607754  |
| 92  | 1 | 0 | -7.518673 | -1.445780 | 7.664310  |
| 93  | 1 | 0 | -5.773768 | -1.167805 | 7.704848  |
| 94  | 1 | 0 | -6.104701 | 1.036993  | 6.510387  |
| 95  | 1 | 0 | -7.836618 | 0.759734  | 6.470210  |
| 96  | 1 | 0 | -7.476607 | -1.292575 | 5.063704  |
| 97  | 1 | 0 | -5.743669 | -1.016005 | 5.103334  |
| 98  | 1 | 0 | -6.071610 | 1.197488  | 3.951007  |
| 99  | 1 | 0 | -7.804523 | 0.919228  | 3.911490  |
| 100 | 1 | 0 | -7.442777 | -1.135415 | 2.507347  |
| 101 | 1 | 0 | -5.709460 | -0.855317 | 2.544269  |
| 102 | 1 | 0 | -6.043847 | 1.365361  | 1.419873  |
| 103 | 1 | 0 | -7.774473 | 1.091677  | 1.373862  |
| 104 | 1 | 0 | 10.353719 | 3.486309  | 6.325659  |
| 105 | 1 | 0 | 11.221839 | 2.380131  | 5.253540  |
| 106 | 1 | 0 | 10.617480 | 3.920081  | 4.631793  |
| 107 | 1 | 0 | 8.244175  | 3.138660  | 5.022062  |
| 108 | 1 | 0 | 8.844685  | 1.610045  | 5.639732  |
| 109 | 1 | 0 | 9.888584  | 1.116517  | 3.406896  |

|     |   |   |            |           |           |
|-----|---|---|------------|-----------|-----------|
| 110 | 1 | 0 | 9.288917   | 2.645874  | 2.788333  |
| 111 | 1 | 0 | 6.925834   | 1.890624  | 3.209444  |
| 112 | 1 | 0 | 7.524810   | 0.361381  | 3.830458  |
| 113 | 1 | 0 | 8.570744   | -0.137073 | 1.607716  |
| 114 | 1 | 0 | 7.979273   | 1.395524  | 0.982546  |
| 115 | 1 | 0 | 5.614560   | 0.659720  | 1.426026  |
| 116 | 1 | 0 | 6.198760   | -0.861826 | 2.064945  |
| 117 | 1 | 0 | 5.338666   | 6.599058  | -4.626174 |
| 118 | 1 | 0 | 3.940889   | 5.599626  | -4.208742 |
| 119 | 1 | 0 | 4.806540   | 6.472897  | -2.942710 |
| 120 | 1 | 0 | 6.860027   | 5.052544  | -3.389688 |
| 121 | 1 | 0 | 5.980510   | 4.175897  | -4.628042 |
| 122 | 1 | 0 | 4.335571   | 3.389765  | -2.883139 |
| 123 | 1 | 0 | 5.247891   | 4.241390  | -1.650995 |
| 124 | 1 | 0 | 7.276972   | 2.821417  | -2.222521 |
| 125 | 1 | 0 | 6.304173   | 1.945237  | -3.391590 |
| 126 | 1 | 0 | 4.738260   | 1.256813  | -1.522972 |
| 127 | 1 | 0 | 5.786073   | 2.080768  | -0.375060 |
| 128 | 1 | 0 | 7.700376   | 0.573469  | -1.138664 |
| 129 | 1 | 0 | 6.580412   | -0.268373 | -2.188608 |
| 130 | 6 | 0 | 8.838210   | -3.614768 | -0.457803 |
| 131 | 6 | 0 | 10.154234  | -4.177845 | -0.510625 |
| 132 | 6 | 0 | 10.534614  | -5.503220 | -0.702727 |
| 133 | 6 | 0 | -10.832139 | -3.135563 | -0.554439 |
| 134 | 6 | 0 | -11.345940 | -4.405452 | -0.802686 |
| 135 | 6 | 0 | 11.910099  | -5.881959 | -0.726562 |
| 136 | 6 | 0 | 9.601202   | -6.562628 | -0.885911 |
| 137 | 6 | 0 | 11.219875  | -3.224946 | -0.338976 |
| 138 | 6 | 0 | -10.526025 | -5.542122 | -1.053327 |
| 139 | 6 | 0 | -12.752664 | -4.643749 | -0.819991 |
| 140 | 6 | 0 | -11.794376 | -2.090691 | -0.319217 |
| 141 | 7 | 0 | 13.024841  | -6.218326 | -0.750151 |
| 142 | 7 | 0 | 8.855201   | -7.445328 | -1.037723 |
| 143 | 7 | 0 | 12.048980  | -2.422803 | -0.195105 |
| 144 | 7 | 0 | -9.874412  | -6.486103 | -1.260758 |
| 145 | 7 | 0 | -13.895717 | -4.865990 | -0.839689 |
| 146 | 7 | 0 | -12.536547 | -1.217544 | -0.123440 |

Table S4. Cartesian coordinates for optimized geometry of TOCR2.

| Center Number | Atomic Number | Atomic Type | Coordinates (Angstroms) |           |           |
|---------------|---------------|-------------|-------------------------|-----------|-----------|
|               |               |             | X                       | Y         | Z         |
| 1             | 6             | 0           | -0.608904               | -0.713356 | -0.134375 |
| 2             | 6             | 0           | 0.822336                | -0.751040 | -0.129978 |
| 3             | 6             | 0           | 1.620354                | 0.440015  | -0.140807 |
| 4             | 6             | 0           | 0.873251                | 1.618777  | -0.159982 |
| 5             | 6             | 0           | -0.533847               | 1.655854  | -0.163020 |
| 6             | 6             | 0           | -1.342695               | 0.518356  | -0.147311 |
| 7             | 7             | 0           | -1.060885               | -1.980364 | -0.132029 |
| 8             | 7             | 0           | 0.054773                | -2.709639 | -0.126530 |
| 9             | 7             | 0           | 1.207155                | -2.039970 | -0.124912 |

|    |    |   |            |           |           |
|----|----|---|------------|-----------|-----------|
| 10 | 6  | 0 | 0.017645   | -4.130174 | -0.127585 |
| 11 | 6  | 0 | -1.214297  | -4.784743 | -0.143355 |
| 12 | 6  | 0 | -1.238116  | -6.178249 | -0.132608 |
| 13 | 6  | 0 | -0.054571  | -6.914901 | -0.104441 |
| 14 | 6  | 0 | 1.167067   | -6.239153 | -0.095824 |
| 15 | 6  | 0 | 1.215585   | -4.847963 | -0.107521 |
| 16 | 6  | 0 | -2.789862  | 0.569752  | -0.139753 |
| 17 | 6  | 0 | 3.068124   | 0.413360  | -0.132342 |
| 18 | 16 | 0 | 4.003619   | 1.911229  | -0.297545 |
| 19 | 6  | 0 | 5.482305   | 1.022278  | -0.181889 |
| 20 | 6  | 0 | 5.273601   | -0.348152 | -0.038450 |
| 21 | 6  | 0 | 3.909340   | -0.688276 | -0.003848 |
| 22 | 6  | 0 | 6.882643   | 1.295854  | -0.165084 |
| 23 | 6  | 0 | 7.570172   | 0.082543  | -0.005013 |
| 24 | 6  | 0 | 6.601849   | -1.098837 | 0.065320  |
| 25 | 16 | 0 | 7.911574   | 2.671924  | -0.285017 |
| 26 | 6  | 0 | 9.340283   | 1.618343  | -0.117717 |
| 27 | 6  | 0 | 8.945716   | 0.268162  | 0.017600  |
| 28 | 16 | 0 | -3.641029  | 2.121910  | -0.251268 |
| 29 | 6  | 0 | -5.166022  | 1.311799  | -0.163914 |
| 30 | 6  | 0 | -5.034296  | -0.071688 | -0.069113 |
| 31 | 6  | 0 | -3.690557  | -0.487367 | -0.045640 |
| 32 | 6  | 0 | -6.547690  | 1.661452  | -0.134074 |
| 33 | 6  | 0 | -7.305332  | 0.484489  | -0.013437 |
| 34 | 6  | 0 | -6.401618  | -0.751092 | 0.041048  |
| 35 | 16 | 0 | -7.490424  | 3.099524  | -0.226838 |
| 36 | 6  | 0 | -8.668599  | 0.753913  | -0.018271 |
| 37 | 6  | 0 | -2.560451  | -6.901451 | -0.208954 |
| 38 | 9  | 0 | -2.537866  | -8.051411 | 0.493784  |
| 39 | 9  | 0 | -2.867494  | -7.220042 | -1.486541 |
| 40 | 9  | 0 | -3.574108  | -6.145831 | 0.267579  |
| 41 | 6  | 0 | 2.444137   | -7.043180 | -0.107356 |
| 42 | 9  | 0 | 3.523688   | -6.284392 | 0.182350  |
| 43 | 9  | 0 | 2.657795   | -7.601407 | -1.319905 |
| 44 | 9  | 0 | 2.397797   | -8.050473 | 0.787841  |
| 45 | 6  | 0 | 4.499275   | -7.085880 | -4.396232 |
| 46 | 6  | 0 | 5.599837   | -6.089644 | -4.018767 |
| 47 | 6  | 0 | 5.167594   | -5.101672 | -2.928397 |
| 48 | 6  | 0 | 6.240463   | -4.064029 | -2.576080 |
| 49 | 6  | 0 | 5.829862   | -3.142389 | -1.418561 |
| 50 | 6  | 0 | 6.853181   | -2.026513 | -1.167390 |
| 51 | 6  | 0 | 6.575490   | -1.223969 | 7.807398  |
| 52 | 6  | 0 | 6.734321   | -2.020470 | 6.508998  |
| 53 | 6  | 0 | 6.577108   | -1.160851 | 5.248709  |
| 54 | 6  | 0 | 6.734325   | -1.951331 | 3.944108  |
| 55 | 6  | 0 | 6.577695   | -1.086936 | 2.686018  |
| 56 | 6  | 0 | 6.736166   | -1.896472 | 1.392707  |
| 57 | 6  | 0 | -10.393665 | -5.007679 | 5.148927  |
| 58 | 6  | 0 | -9.086531  | -4.280671 | 4.819796  |
| 59 | 6  | 0 | -9.098331  | -3.610797 | 3.440183  |
| 60 | 6  | 0 | -7.792250  | -2.881317 | 3.103259  |
| 61 | 6  | 0 | -7.807956  | -2.209439 | 1.722824  |
| 62 | 6  | 0 | -6.489161  | -1.491337 | 1.410793  |
| 63 | 6  | 0 | -4.891067  | -7.076660 | -4.190889 |

|     |   |   |            |           |           |
|-----|---|---|------------|-----------|-----------|
| 64  | 6 | 0 | -5.835447  | -5.904556 | -3.908109 |
| 65  | 6 | 0 | -5.344402  | -4.983149 | -2.784258 |
| 66  | 6 | 0 | -6.271765  | -3.789259 | -2.527080 |
| 67  | 6 | 0 | -5.818680  | -2.905460 | -1.356061 |
| 68  | 6 | 0 | -6.712687  | -1.671287 | -1.177825 |
| 69  | 1 | 0 | 1.392408   | 2.572122  | -0.162243 |
| 70  | 1 | 0 | -1.001517  | 2.635455  | -0.168456 |
| 71  | 1 | 0 | -2.131533  | -4.212505 | -0.157255 |
| 72  | 1 | 0 | -0.083707  | -7.997883 | -0.078415 |
| 73  | 1 | 0 | 2.160702   | -4.323646 | -0.096357 |
| 74  | 1 | 0 | 3.515926   | -1.687152 | 0.116459  |
| 75  | 1 | 0 | 9.685143   | -0.517892 | 0.129728  |
| 76  | 1 | 0 | -3.351598  | -1.509160 | 0.043612  |
| 77  | 1 | 0 | -9.457605  | 0.012593  | 0.041818  |
| 78  | 1 | 0 | 4.847594   | -7.802270 | -5.147099 |
| 79  | 1 | 0 | 4.161737   | -7.652044 | -3.521750 |
| 80  | 1 | 0 | 3.625162   | -6.570205 | -4.810381 |
| 81  | 1 | 0 | 5.913074   | -5.532136 | -4.911947 |
| 82  | 1 | 0 | 6.488618   | -6.636580 | -3.676220 |
| 83  | 1 | 0 | 4.887537   | -5.660858 | -2.025635 |
| 84  | 1 | 0 | 4.256728   | -4.578890 | -3.255166 |
| 85  | 1 | 0 | 6.464326   | -3.457726 | -3.465011 |
| 86  | 1 | 0 | 7.176509   | -4.577601 | -2.315559 |
| 87  | 1 | 0 | 5.690219   | -3.752444 | -0.517029 |
| 88  | 1 | 0 | 4.854408   | -2.695797 | -1.647969 |
| 89  | 1 | 0 | 6.909910   | -1.395109 | -2.062083 |
| 90  | 1 | 0 | 7.849895   | -2.469853 | -1.041373 |
| 91  | 1 | 0 | 6.693157   | -1.864746 | 8.687144  |
| 92  | 1 | 0 | 7.322414   | -0.425045 | 7.876089  |
| 93  | 1 | 0 | 5.586346   | -0.755807 | 7.867064  |
| 94  | 1 | 0 | 5.996749   | -2.834335 | 6.485886  |
| 95  | 1 | 0 | 7.719914   | -2.505168 | 6.495028  |
| 96  | 1 | 0 | 7.315543   | -0.346841 | 5.271257  |
| 97  | 1 | 0 | 5.591183   | -0.674459 | 5.262472  |
| 98  | 1 | 0 | 5.995450   | -2.765318 | 3.922118  |
| 99  | 1 | 0 | 7.720084   | -2.437699 | 3.931690  |
| 100 | 1 | 0 | 7.318079   | -0.277652 | 2.709235  |
| 101 | 1 | 0 | 5.592525   | -0.603560 | 2.699798  |
| 102 | 1 | 0 | 5.995343   | -2.704797 | 1.386519  |
| 103 | 1 | 0 | 7.719194   | -2.386198 | 1.387735  |
| 104 | 1 | 0 | -10.353825 | -5.474013 | 6.138542  |
| 105 | 1 | 0 | -11.244259 | -4.316947 | 5.140807  |
| 106 | 1 | 0 | -10.603487 | -5.796659 | 4.417874  |
| 107 | 1 | 0 | -8.249534  | -4.990496 | 4.869951  |
| 108 | 1 | 0 | -8.886049  | -3.521602 | 5.588097  |
| 109 | 1 | 0 | -9.935423  | -2.900207 | 3.389910  |
| 110 | 1 | 0 | -9.300081  | -4.369918 | 2.670965  |
| 111 | 1 | 0 | -6.955625  | -3.592932 | 3.151328  |
| 112 | 1 | 0 | -7.589834  | -2.123320 | 3.872943  |
| 113 | 1 | 0 | -8.640039  | -1.495452 | 1.685546  |
| 114 | 1 | 0 | -8.016726  | -2.969836 | 0.959652  |
| 115 | 1 | 0 | -5.668620  | -2.217901 | 1.456540  |
| 116 | 1 | 0 | -6.284178  | -0.756806 | 2.199112  |
| 117 | 1 | 0 | -5.280742  | -7.718921 | -4.987209 |

|     |   |   |            |           |           |
|-----|---|---|------------|-----------|-----------|
| 118 | 1 | 0 | -3.902558  | -6.721771 | -4.504065 |
| 119 | 1 | 0 | -4.747914  | -7.695705 | -3.299323 |
| 120 | 1 | 0 | -6.830167  | -6.290553 | -3.646983 |
| 121 | 1 | 0 | -5.972127  | -5.314936 | -4.824917 |
| 122 | 1 | 0 | -4.339369  | -4.612772 | -3.034018 |
| 123 | 1 | 0 | -5.228655  | -5.565158 | -1.860300 |
| 124 | 1 | 0 | -7.289956  | -4.153888 | -2.330948 |
| 125 | 1 | 0 | -6.339410  | -3.179476 | -3.438953 |
| 126 | 1 | 0 | -4.783080  | -2.586786 | -1.529459 |
| 127 | 1 | 0 | -5.809801  | -3.509613 | -0.439574 |
| 128 | 1 | 0 | -7.757908  | -1.993448 | -1.097067 |
| 129 | 1 | 0 | -6.656607  | -1.056982 | -2.084532 |
| 130 | 6 | 0 | -8.980454  | 2.128418  | -0.118706 |
| 131 | 6 | 0 | -10.328948 | 2.554992  | -0.122879 |
| 132 | 1 | 0 | -10.990878 | 1.699984  | -0.043844 |
| 133 | 6 | 0 | -10.950713 | 3.786869  | -0.204410 |
| 134 | 6 | 0 | -11.319972 | 6.124406  | -0.385150 |
| 135 | 6 | 0 | -12.582165 | 5.510452  | -0.310042 |
| 136 | 6 | 0 | -11.152349 | 7.498339  | -0.500233 |
| 137 | 6 | 0 | -13.733647 | 6.306592  | -0.352147 |
| 138 | 6 | 0 | -12.299761 | 8.276072  | -0.540796 |
| 139 | 6 | 0 | -13.567514 | 7.681257  | -0.467507 |
| 140 | 6 | 0 | -10.263319 | 5.089718  | -0.322681 |
| 141 | 6 | 0 | -12.393422 | 4.039870  | -0.193059 |
| 142 | 8 | 0 | -9.056031  | 5.301623  | -0.364248 |
| 143 | 6 | 0 | -13.428099 | 3.125080  | -0.092050 |
| 144 | 6 | 0 | -14.806970 | 3.498922  | -0.092862 |
| 145 | 6 | 0 | -13.241186 | 1.713516  | 0.025764  |
| 146 | 7 | 0 | -15.940863 | 3.767141  | -0.090314 |
| 147 | 7 | 0 | -13.123521 | 0.557992  | 0.123853  |
| 148 | 1 | 0 | -10.166932 | 7.947210  | -0.556313 |
| 149 | 1 | 0 | -14.740371 | 5.915421  | -0.300533 |
| 150 | 6 | 0 | 10.711374  | 1.965632  | -0.106783 |
| 151 | 1 | 0 | 11.319995  | 1.076694  | 0.014988  |
| 152 | 6 | 0 | 11.406206  | 3.155541  | -0.216192 |
| 153 | 6 | 0 | 13.138219  | 4.776513  | -0.343319 |
| 154 | 6 | 0 | 11.916116  | 5.460099  | -0.465355 |
| 155 | 6 | 0 | 14.335231  | 5.502324  | -0.386615 |
| 156 | 6 | 0 | 11.832057  | 6.836794  | -0.628710 |
| 157 | 6 | 0 | 13.023899  | 7.544509  | -0.670092 |
| 158 | 6 | 0 | 14.252716  | 6.879654  | -0.550204 |
| 159 | 6 | 0 | 12.860918  | 3.324142  | -0.183187 |
| 160 | 6 | 0 | 10.799285  | 4.491511  | -0.391588 |
| 161 | 8 | 0 | 9.607588   | 4.771859  | -0.465264 |
| 162 | 6 | 0 | 13.837724  | 2.354239  | -0.032713 |
| 163 | 6 | 0 | 15.236017  | 2.646801  | -0.016604 |
| 164 | 6 | 0 | 13.565766  | 0.960355  | 0.123830  |
| 165 | 7 | 0 | 16.383484  | 2.848436  | 0.001146  |
| 166 | 7 | 0 | 13.378454  | -0.182743 | 0.253915  |
| 167 | 1 | 0 | 15.315934  | 5.055116  | -0.300650 |
| 168 | 1 | 0 | 10.876092  | 7.340166  | -0.720458 |
| 169 | 9 | 0 | -12.224635 | 9.607716  | -0.650580 |
| 170 | 9 | 0 | -14.641077 | 8.479676  | -0.511613 |
| 171 | 9 | 0 | 15.372129  | 7.612213  | -0.597185 |

172                      9                      0                      13.029564                      8.873778                      -0.824891

---

**Table S5.** Topologies and energy values of frontier molecular orbitals and HOMO-LUMO gaps of the compounds **TOCR1** and **TOCR2** calculated at B3LYP/6-31G(d,p) level.

| HOMO (eV)                                                                                   | LUMO (eV)                                                                                    | HOMO-LUMO Gap (eV) |
|---------------------------------------------------------------------------------------------|----------------------------------------------------------------------------------------------|--------------------|
| 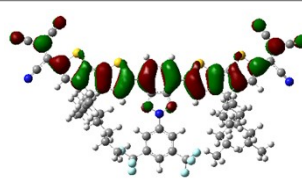<br>-5,77  | <br>-3,89  | 1,87               |
| <br>-5,47 | <br>-3,62 | 1,85               |



## Photophysical study

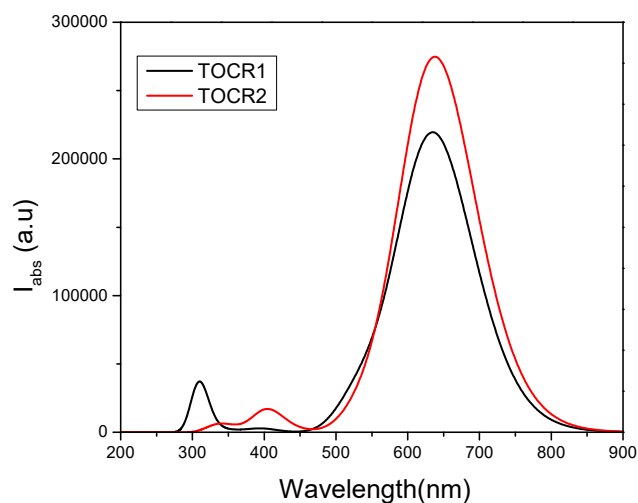

**Figure S24.** Theoretical absorption spectra of compounds **TOCR1** and **TOCR2** calculated at M062x/6-311+G(2d,p) level in CH<sub>2</sub>Cl<sub>2</sub>.

**Table S6.** Electronic transitions associated with the absorption spectra of compounds **TOCR1** and **TOCR2** calculated at M062x/6-311+G(2d,p) level. Only transitions with  $f \geq 0.1$  and a contribution greater than 10% are described.

| <i>Electroni</i> |                                |              |           |          |                                                     |
|------------------|--------------------------------|--------------|-----------|----------|-----------------------------------------------------|
| <i>Compound</i>  | <i>c</i>                       | <i>E(eV)</i> | $\lambda$ | <i>f</i> | <i>MO (coefficient %)</i>                           |
| <i>d</i>         | <i>transitio</i>               | )            | (nm)      |          |                                                     |
|                  | <i>n</i>                       |              |           |          |                                                     |
| <b>TOCR1</b>     | S <sub>0</sub> →S <sub>1</sub> | 1,95         | 636,92    | 2,97     | H→L (82), H-1→L+1 (13)                              |
|                  | S <sub>0</sub> →S <sub>2</sub> | 2,28         | 543,53    | 0,51     | H-1→L (33), H→L+1 (62)                              |
|                  | S <sub>0</sub> →S <sub>9</sub> | 4,00         | 309,64    | 0,47     | H-6→L (16), H-3→L (18),<br>H-1→L+2 (16)             |
| <b>TOCR2</b>     | S <sub>0</sub> →S <sub>1</sub> | 1,94         | 639,96    | 3,71     | H→L (78), H-1→L+1 (15)                              |
|                  | S <sub>0</sub> →S <sub>2</sub> | 2,23         | 556,04    | 0,43     | H-1→L (37), H→L+1 (53)                              |
|                  | S <sub>0</sub> →S <sub>4</sub> | 3,05         | 407,01    | 0,19     | H-1→L (11), H-1→L+2 (26),<br>H→L+1 (13), H→L+3 (35) |

E: Transition energy,  $\lambda$ : Wavelength of the transition, f: Transition oscillator strength, MO: Molecular orbitals involved in the transition (H: HOMO. L: LUMO).

## 8. Photovoltaic studies

**Table S6a.** Photovoltaic parameters of the P1:TOCR1 based PSCs for different weight ratio of P1 and TOCR1

| <b>D:A weight ratio</b> | <b>J<sub>SC</sub> (mA/cm<sup>2</sup>)</b> | <b>V<sub>OC</sub> (V)</b> | <b>FF</b> | <b>PCE (%)</b> |
|-------------------------|-------------------------------------------|---------------------------|-----------|----------------|
| 1:0.4                   | 15.94                                     | 0.76                      | 0.52      | 6.30           |
| 1:0.8                   | 16.53                                     | 0.77                      | 0.55      | 7.00           |
| 1:1.2                   | 17.09                                     | 0.76                      | 0.59      | 7.66           |
| 1:1.3                   | 16.47                                     | 0.75                      | 0.56      | 6.92           |

**Table S6b.** Photovoltaic parameters of the P1:TOCR2 based PSCs for different weight ratio of P1 and TOCR2

| <b>D:A weight ratio</b> | <b>J<sub>SC</sub> (mA/cm<sup>2</sup>)</b> | <b>V<sub>OC</sub> (V)</b> | <b>FF</b> | <b>PCE (%)</b> |
|-------------------------|-------------------------------------------|---------------------------|-----------|----------------|
| 1:0.4                   | 17.98                                     | 0.91                      | 0.56      | 9.16           |
| 1:0.8                   | 18.52                                     | 0.92                      | 0.60      | 10.22          |
| 1:1.2                   | 19.38                                     | 0.91                      | 0.63      | 11.11          |
| 1:1.3                   | 18.64                                     | 0.92                      | 0.61      | 10.46          |

**Table S7a.** Photovoltaic parameters of the P2:TOCR1 based PSCs for different weight ratio of P2 and TOCR1

| <b>D:A weight ratio</b> | <b>J<sub>SC</sub> (mA/cm<sup>2</sup>)</b> | <b>V<sub>OC</sub> (V)</b> | <b>FF</b> | <b>PCE (%)</b> |
|-------------------------|-------------------------------------------|---------------------------|-----------|----------------|
| 1:0.4                   | 17.02                                     | 0.83                      | 0.51      | 7.20           |
| 1:0.8                   | 17.94                                     | 0.84                      | 0.54      | 8.14           |
| 1:1.2                   | 18.45                                     | 0.82                      | 0.57      | 8.621          |
| 1:1.3                   | 17.84                                     | 0.83                      | 0.55      | 8.13           |

**Table S7b.** Photovoltaic parameters of the P2:TOCR2 based PSCs for different weight ratio of P2 and TOCR2

| <b>D:A weight ratio</b> | <b>J<sub>SC</sub> (mA/cm<sup>2</sup>)</b> | <b>V<sub>OC</sub> (V)</b> | <b>FF</b> | <b>PCE (%)</b> |
|-------------------------|-------------------------------------------|---------------------------|-----------|----------------|
| 1:0.4                   | 6.82                                      | 0.94                      | 0.43      | 2.76           |
| 1:0.8                   | 7.44                                      | 0.95                      | 0.45      | 3.18           |
| 1:1.2                   | 7.14                                      | 0.96                      | 0.49      | 3.36           |
| 1:1.3                   | 6.64                                      | 0.97                      | 0.48      | 3.09           |

**Table S8a.** Photovoltaic parameters of the PSCs based on P1:TOCR1 (1:1.2) active layer subjected to SVA treatment for different times.

| <b>SVA exposure time</b> | <b>J<sub>SC</sub> (mA/cm<sup>2</sup>)</b> | <b>V<sub>OC</sub> (V)</b> | <b>FF</b> | <b>PCE (%)</b> |
|--------------------------|-------------------------------------------|---------------------------|-----------|----------------|
| 10 s                     | 20.15                                     | 0.73                      | 0.62      | 9.12           |
| 30 s                     | 20.78                                     | 0.72                      | 0.65      | 9.73           |
| 40 s                     | 21.38                                     | 0.72                      | 0.67      | 10.31          |
| 50 s                     | 20.85                                     | 0.73                      | 0.66      | 10.04          |

**Table S8b.** Photovoltaic parameters of the PSCs based on P1:TOCR2 (1:1.2) active layer subjected to SVA treatment for different times.

| <b>SVA exposure time</b> | <b>J<sub>SC</sub> (mA/cm<sup>2</sup>)</b> | <b>V<sub>OC</sub> (V)</b> | <b>FF</b> | <b>PCE (%)</b> |
|--------------------------|-------------------------------------------|---------------------------|-----------|----------------|
| 10 s                     | 23.06                                     | 0.87                      | 0.67      | 12.44          |
| 30 s                     | 23.71                                     | 0.86                      | 0.69      | 13.25          |
| 40 s                     | 24.22                                     | 0.87                      | 0.72      | 15.17          |
| 50 s                     | 23.82                                     | 0.88                      | 0.68      | 14.25          |

**Table S9a.** Photovoltaic parameters of the PSCs based on P2:TOCR1 (1:1.2) active layer subjected to SVA treatment for different times.

| <b>SVA exposure time</b> | <b>J<sub>SC</sub> (mA/cm<sup>2</sup>)</b> | <b>V<sub>OC</sub> (V)</b> | <b>FF</b> | <b>PCE (%)</b> |
|--------------------------|-------------------------------------------|---------------------------|-----------|----------------|
| 10 s                     | 20.86                                     | 0.82                      | 0.61      | 10.43          |
| 30 s                     | 22.41                                     | 0.80                      | 0.63      | 11.29          |
| 40 s                     | 23.08                                     | 0.78                      | 0.66      | 11.88          |
| 50 s                     | 22.52                                     | 0.76                      | 0.63      | 10.78          |

**Table S9b.** Photovoltaic parameters of the PSCs based on P2:TOCR2 (1:1.2) active layer subjected to SVA treatment for different times.

| <b>SVA exposure time</b> | <b>J<sub>SC</sub> (mA/cm<sup>2</sup>)</b> | <b>V<sub>OC</sub> (V)</b> | <b>FF</b> | <b>PCE (%)</b> |
|--------------------------|-------------------------------------------|---------------------------|-----------|----------------|
| 10 s                     | 9.02                                      | 0.95                      | 0.51      | 4.37           |
| 30 s                     | 9.68                                      | 0.95                      | 0.54      | 4.96           |
| 40 s                     | 10.21                                     | 0.93                      | 0.57      | 5.41           |
| 50 s                     | 9.86                                      | 0.93                      | 0.55      | 5.04           |

## 9. XRD studies

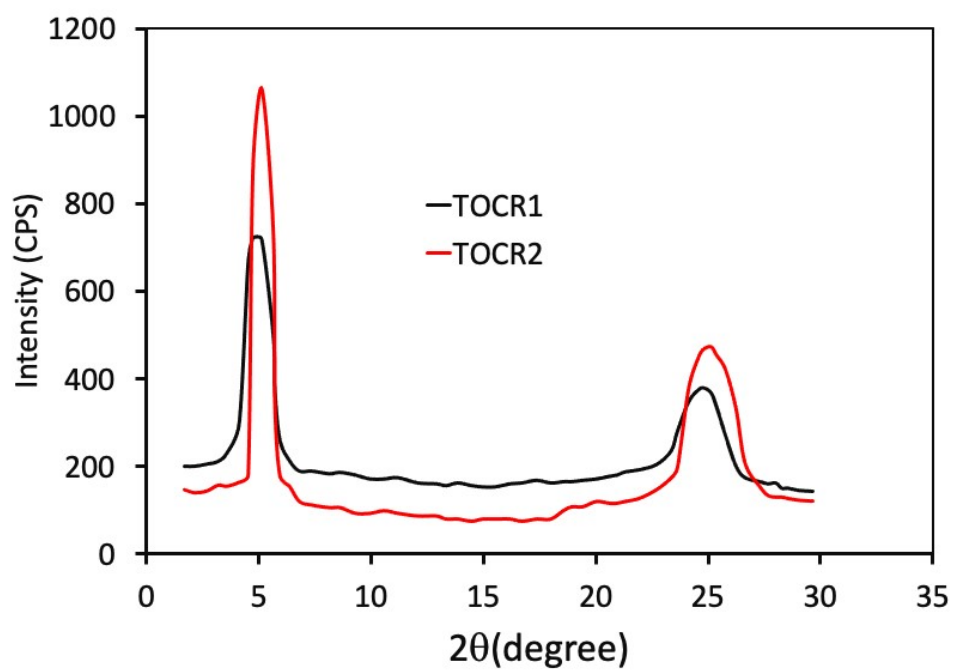

**Figure S25.** XRD patterns of pristine **TOCR1** and **TOCR2** films.
